# Supplementary material for: Developing a high-voltage electrolyte based on conjuncto-hydroborates for solid-state sodium batteries
Source: Royal Society of Chemistry journal article supplement (doi:10.1039/d1ta09386j), 2022-01-01
Supplement: d1ta09386j1.pdf [file d1ta09386j1.pdf]

## Electronic supplementary information

### Developing high voltage electrolyte based on *conjuncto*-hydroborate for solid-state sodium battery

Zhuo Yang<sup>a</sup>, Mengyuan Jin<sup>a</sup>, Sheng Cheng<sup>a</sup>, Xiaohua Ma<sup>a</sup>, Zhao Qin<sup>b</sup>, Jiankan Zhang<sup>b</sup>, Yanjing Yang<sup>b\*</sup>,  
Yanhui Guo<sup>a\*</sup>

<sup>a</sup> Department of Materials Science, Fudan University, Shanghai, 200433, PR China. E-mail:  
gyh@fudan.edu.cn;

<sup>b</sup> Xi'an Modern Chemistry Research Institute, Xi'an, Shaanxi, 710065, China.

E-mail: [yj.zju.91@gmail.com](mailto:yj.zju.91@gmail.com)

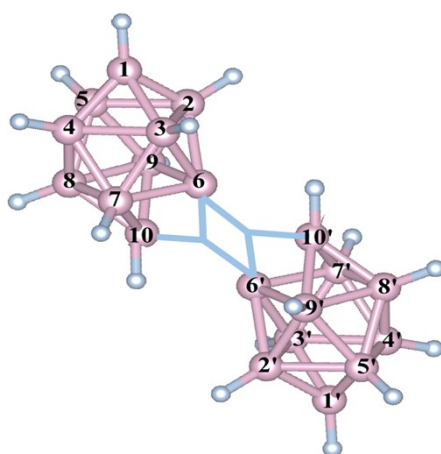

**Table S1.** <sup>11</sup>B nuclei chemical shifts (ppm) for [B<sub>20</sub>H<sub>18</sub>]<sup>2-</sup>

| <sup>11</sup> B Nuclei          | δ( <sup>11</sup> B) (ppm) |
|---------------------------------|---------------------------|
| B (1) = B (1')                  | 31.07                     |
| B (6) = B (6')                  | 16.03                     |
| B (8) = B (8')                  | -6.75                     |
| B (7) = B (9) = B (7') = B (9') | -12.46                    |
| B (2) = B (3) = B (2') = B (3') | -15.81                    |
| B (4) = B (5) = B (4') = B (5') | -19.25                    |
| B (10) = B (10')                | -25.49                    |

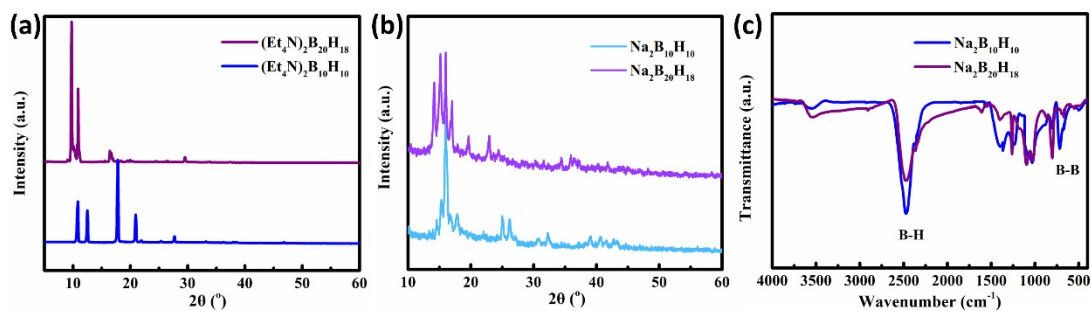

**Fig. S1** XRD patterns of (a)  $(\text{Et}_4\text{N})_2\text{B}_{20}\text{H}_{18}$  and  $(\text{Et}_4\text{N})_2\text{B}_{10}\text{H}_{10}$ . (b) anhydrous  $\text{Na}_2\text{B}_{20}\text{H}_{18}$  and  $\text{Na}_2\text{B}_{10}\text{H}_{10}$ . (c) FTIR spectra of  $\text{Na}_2\text{B}_{20}\text{H}_{18}$  and  $\text{Na}_2\text{B}_{10}\text{H}_{10}$ .

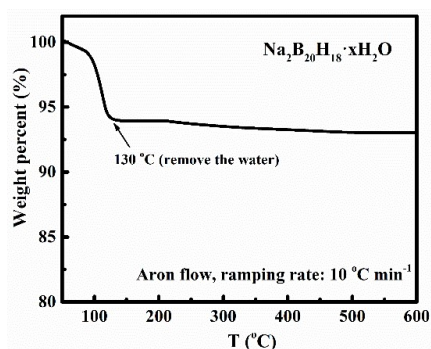

**Fig. S2** TGA result of  $\text{Na}_2\text{B}_{20}\text{H}_{18}\cdot x\text{H}_2\text{O}$  (Argon flow,  $\Delta T/\Delta t=10\text{ }^\circ\text{C min}^{-1}$ ).

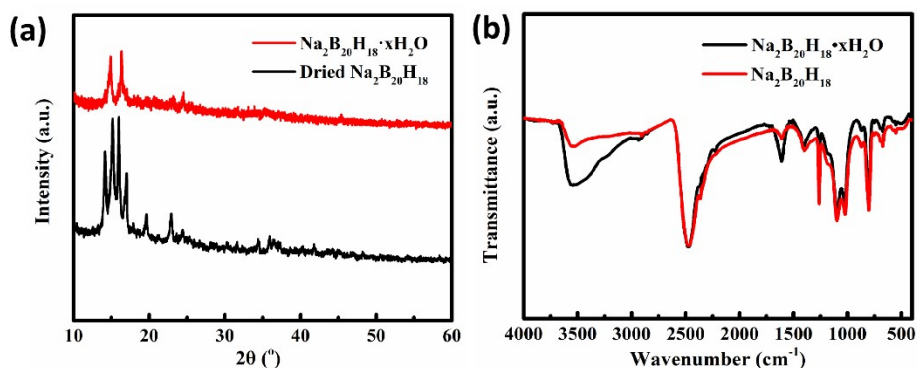

**Fig. S3** (a) XRD patterns of dried  $\text{Na}_2\text{B}_{20}\text{H}_{18}$  and  $\text{Na}_2\text{B}_{20}\text{H}_{18}\cdot x\text{H}_2\text{O}$ . (b) FTIR spectra of dried  $\text{Na}_2\text{B}_{20}\text{H}_{18}$  and  $\text{Na}_2\text{B}_{20}\text{H}_{18}\cdot x\text{H}_2\text{O}$ .

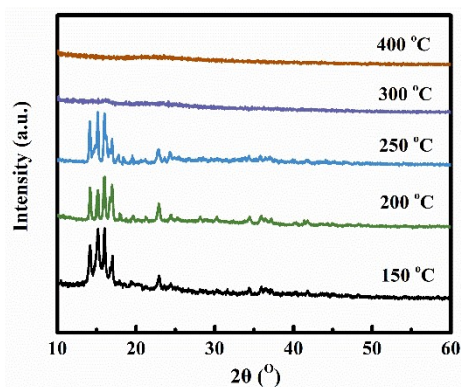

**Fig. S4** *Ex-situ*-temperature-dependent XRD patterns of  $\text{Na}_2\text{B}_{20}\text{H}_{18}$

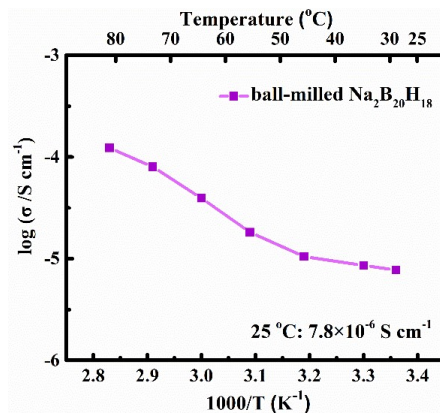

Fig. S5 Arrhenius plot ( $\log(\sigma)$  vs  $1/T$ ) of ball-milled  $\text{Na}_2\text{B}_{20}\text{H}_{18}$ .

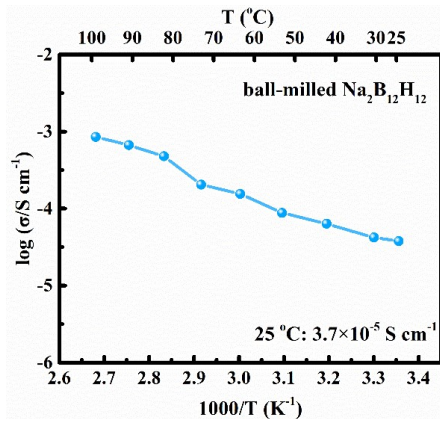

Fig. S6 Arrhenius plot ( $\log(\sigma)$  vs  $1/T$ ) of ball-milled  $\text{Na}_2\text{B}_{12}\text{H}_{12}$ .

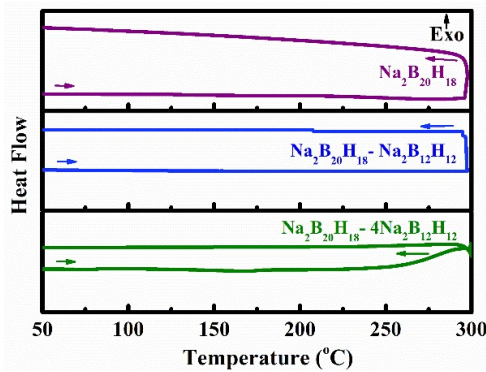

Fig. S7 Differential scanning calorimetry of the samples ( $\Delta T / \Delta t = 5 \text{ }^\circ\text{C min}^{-1}$ ).

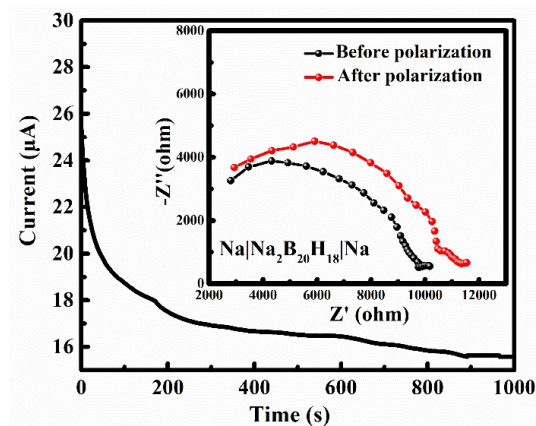

Fig. S8 The chrono current curve of a symmetrical battery  $\text{Na}|\text{Na}_2\text{B}_{20}\text{H}_{18}|\text{Na}$  at a polarization

voltage of 10 mV. The inset is the impedance spectrum before and after polarization

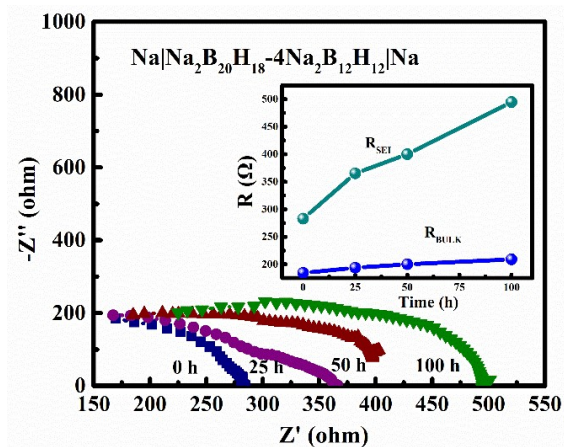

**Fig. S9** Nyquist plots measured after 0-100 h of contacting the Na<sub>2</sub>B<sub>20</sub>H<sub>18</sub>-4Na<sub>2</sub>B<sub>12</sub>H<sub>12</sub> SE with Na metal. The inset shows solid electrolyte interface (SEI) and bulk resistances plotted versus time.
